# Supplementary material for: Autophagy Targeting and Hematological Mobilization in FLT3-ITD Acute Myeloid Leukemia Decrease Repopulating Capacity and Relapse by Inducing Apoptosis of Committed Leukemic Cells
Source: MDPI journal article supplement (doi:10.3390/cancers14020453), 2022-01-17
Supplement: s1 [file s1]

Figure S1A

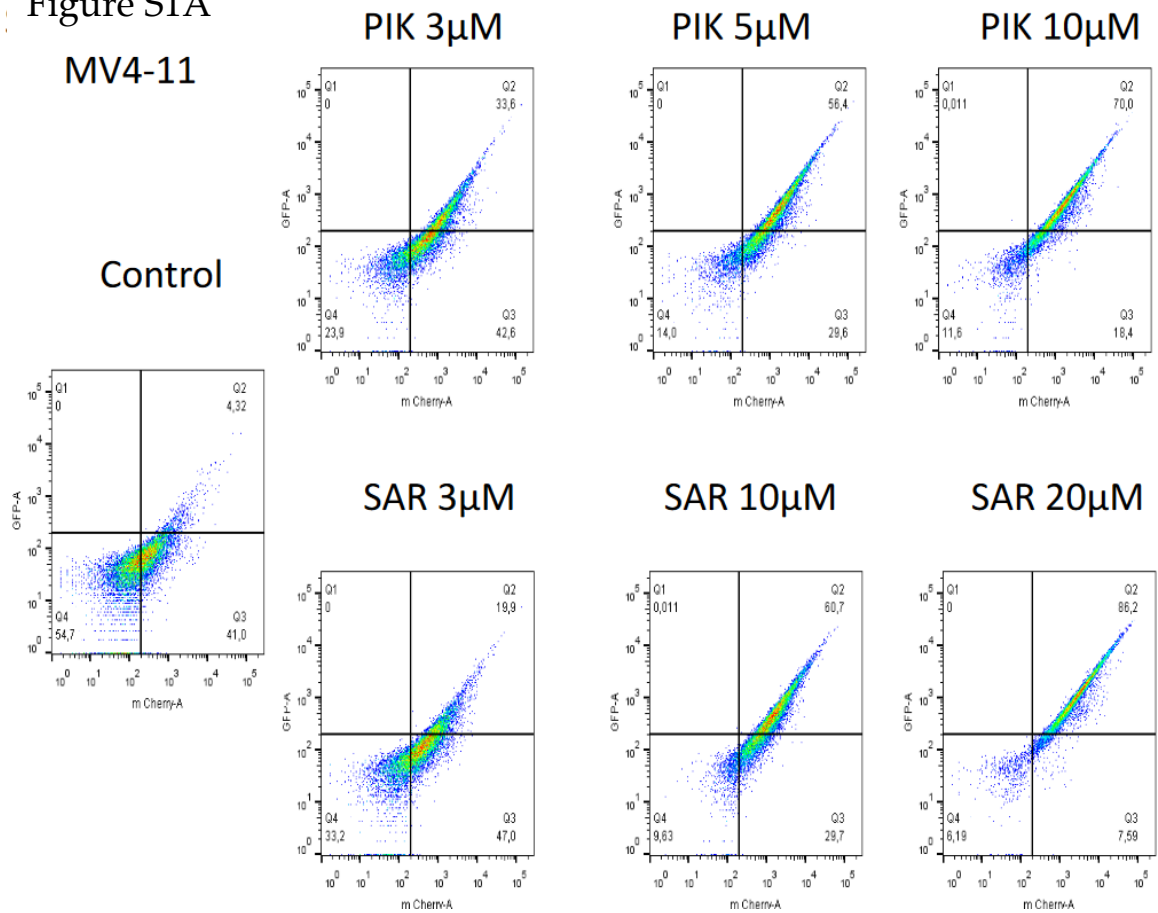

Figure S1B

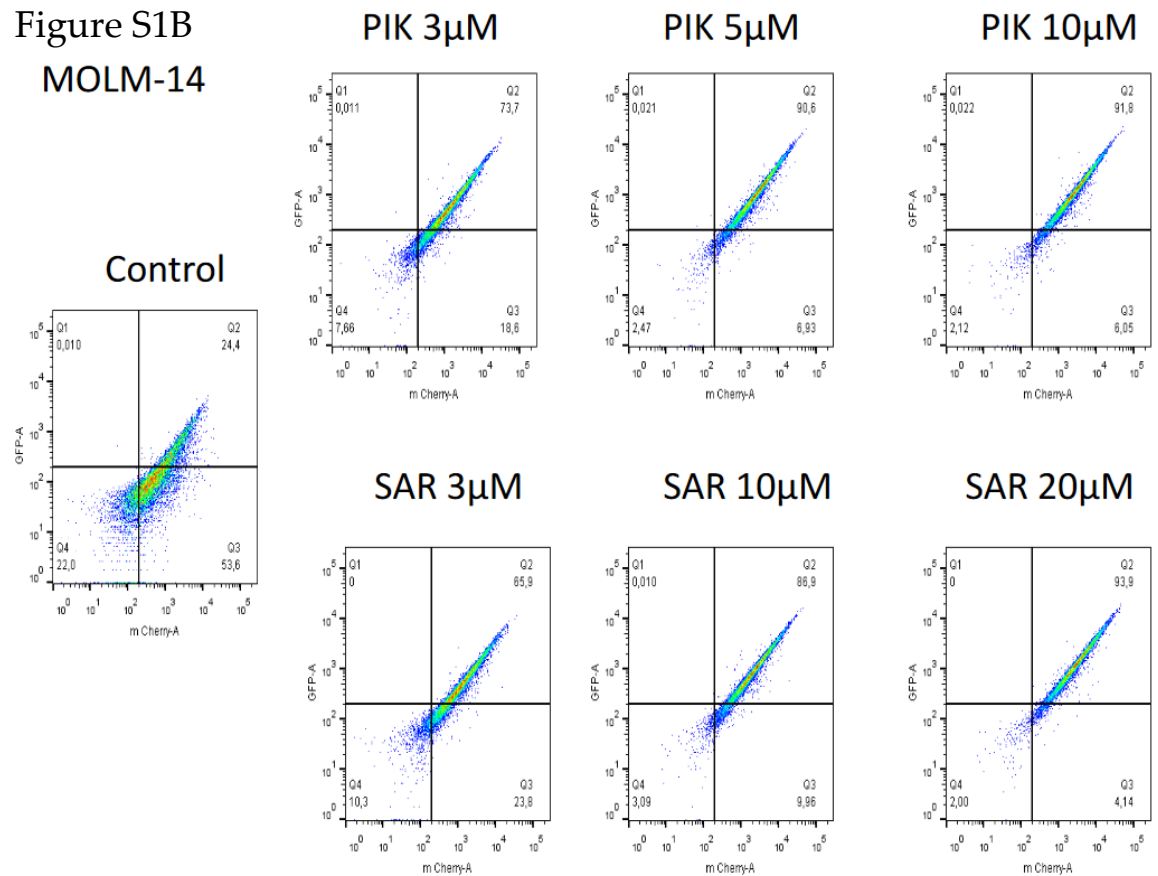

Figure S1C  
Oci-AML3

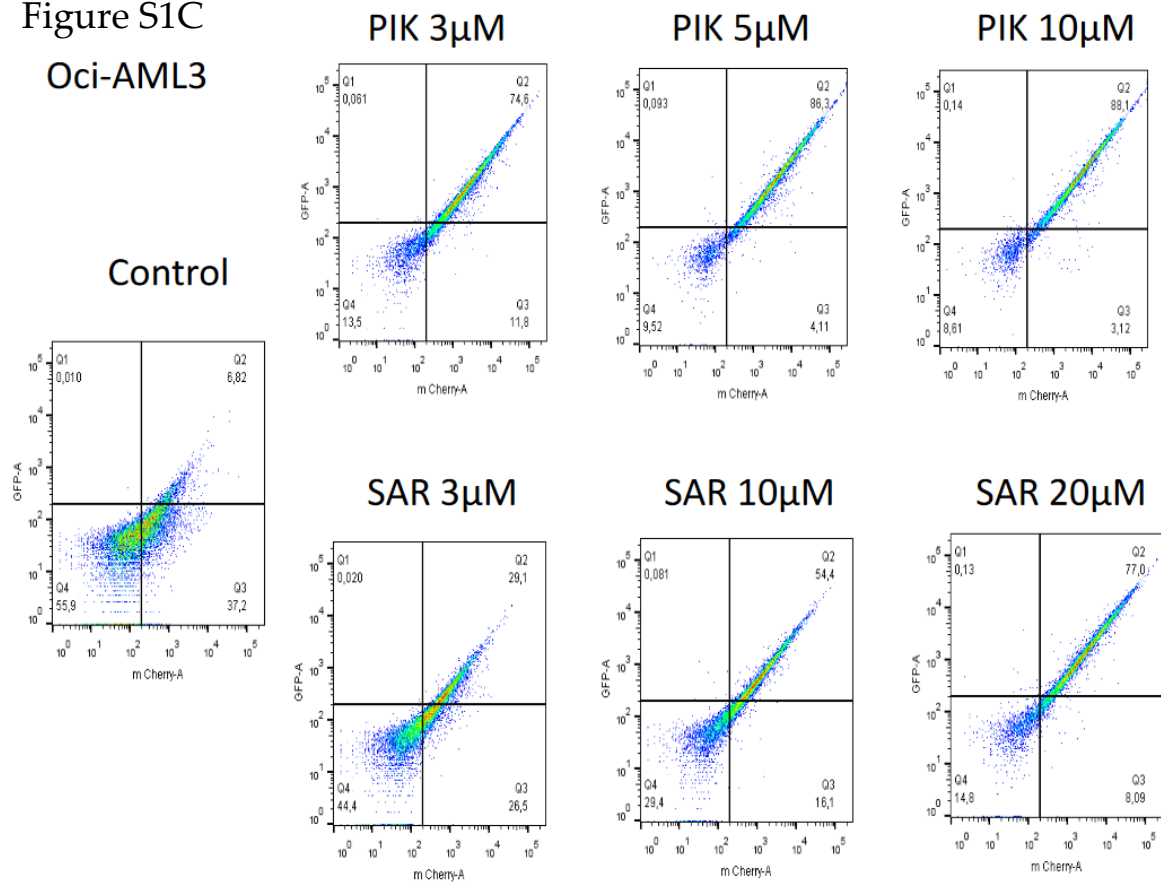

Figure S1D

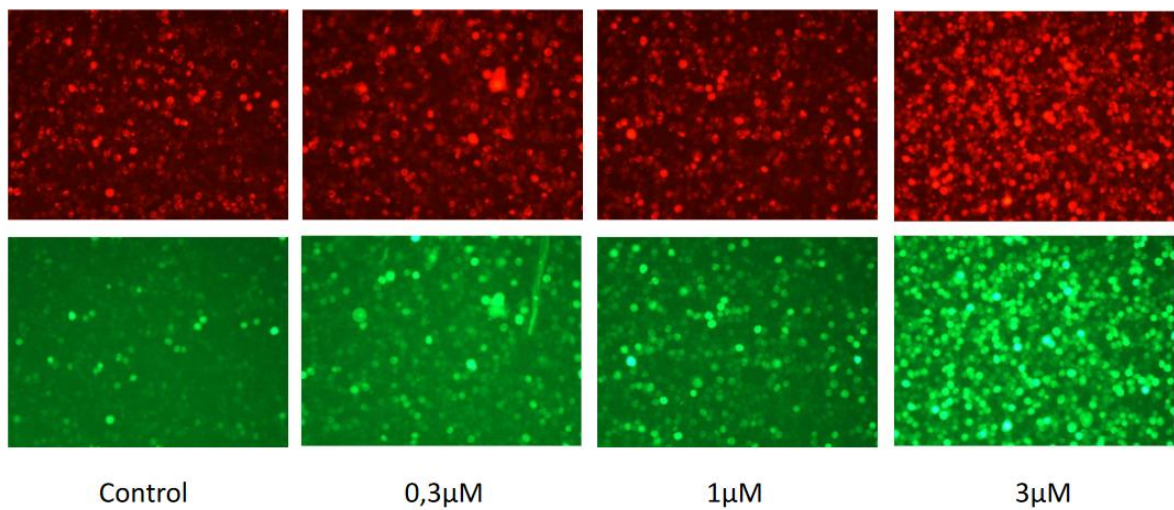

MV4-11 mCherry-GFP  $\rightarrow$  Inhibitor PIK – III

Figure S1E

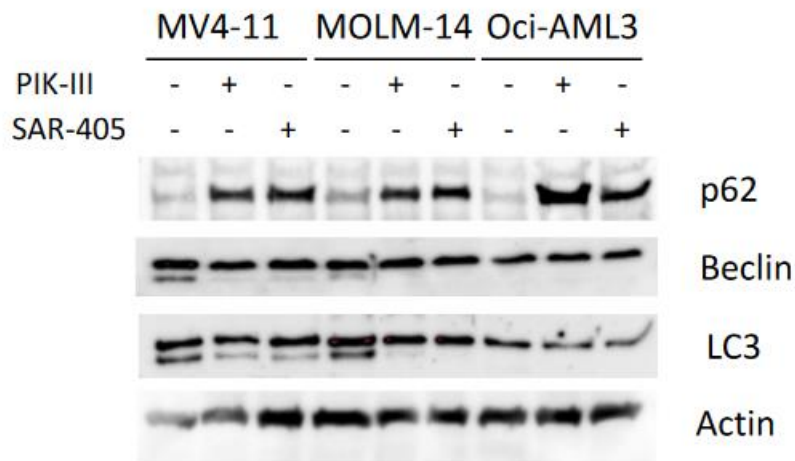

Figure S2A

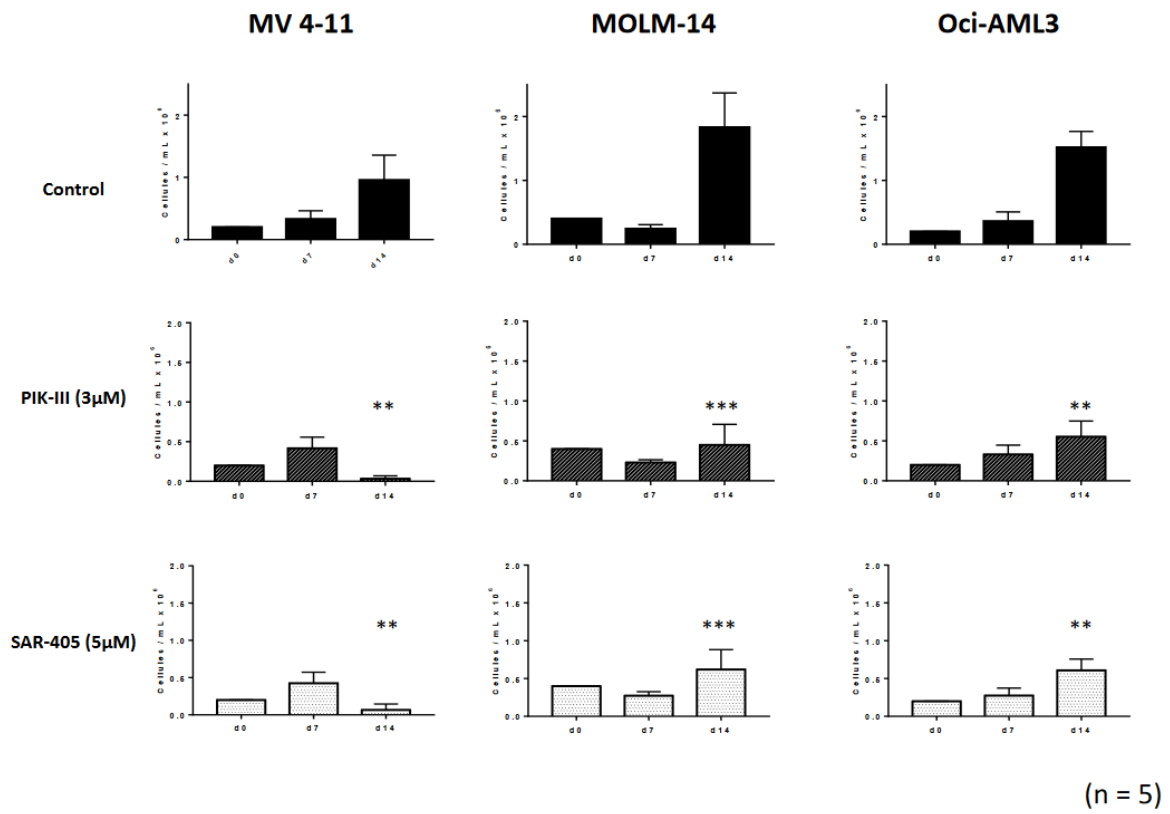

Figure S2B

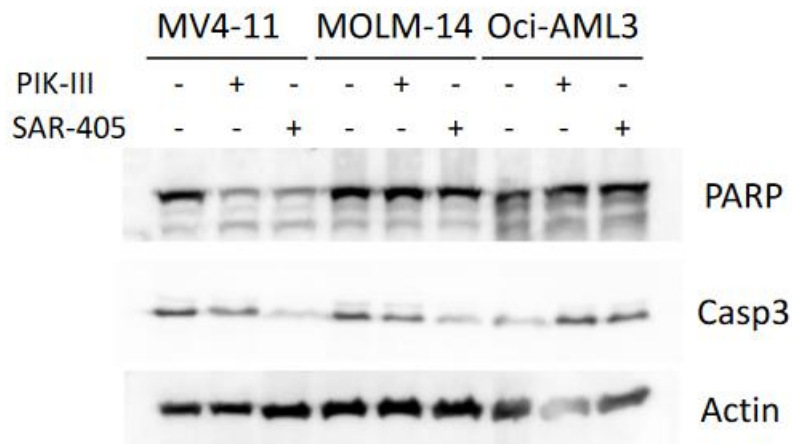

Figure S3A

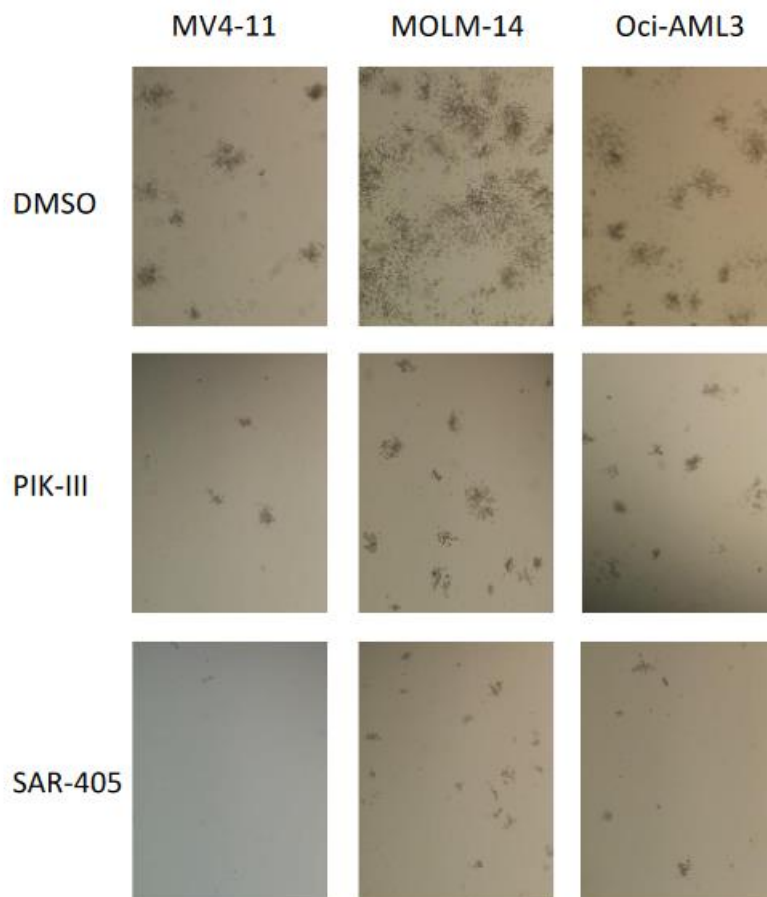

# Figure S3B

Two different experiments illustrating CFC assay

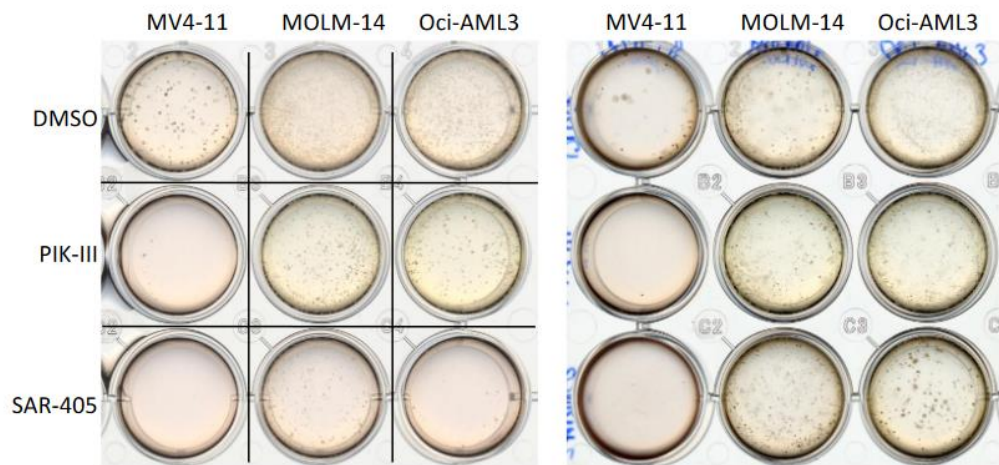

# Figure S4A

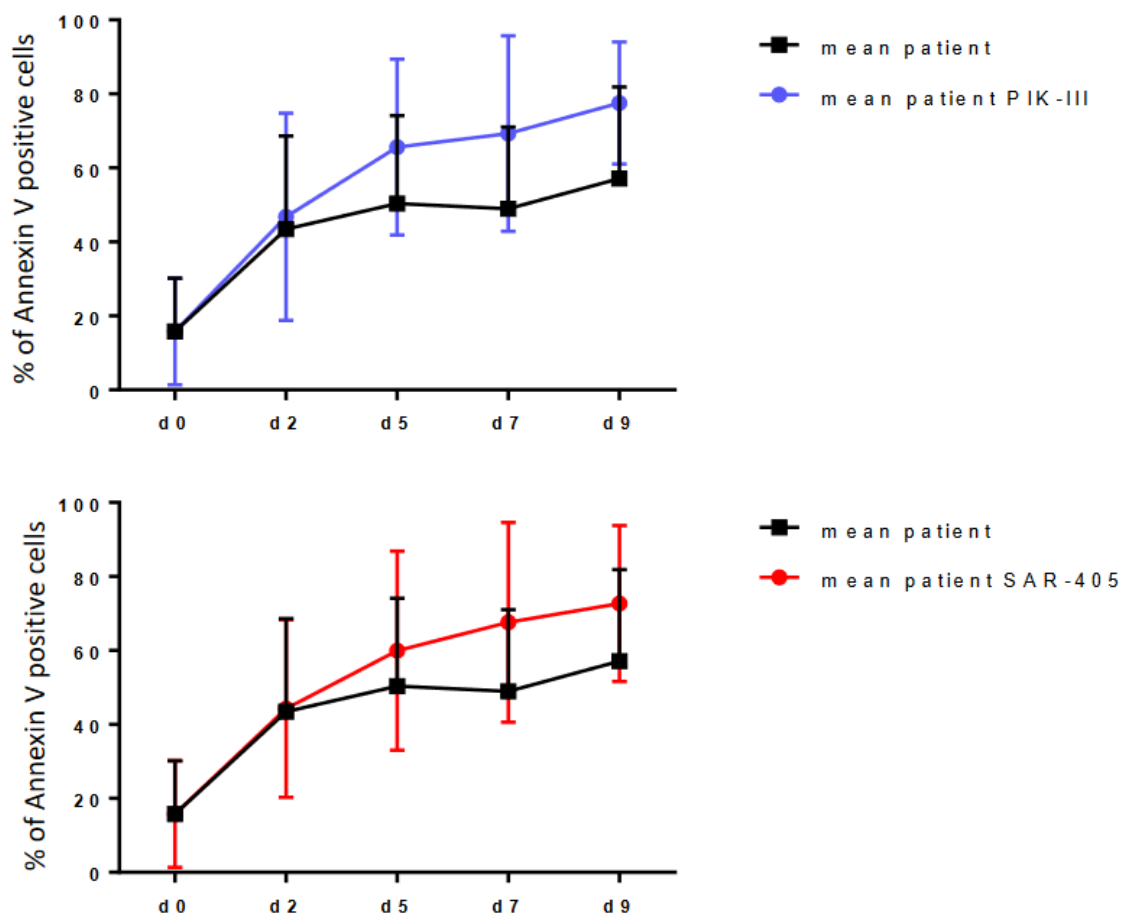

Figure S4B

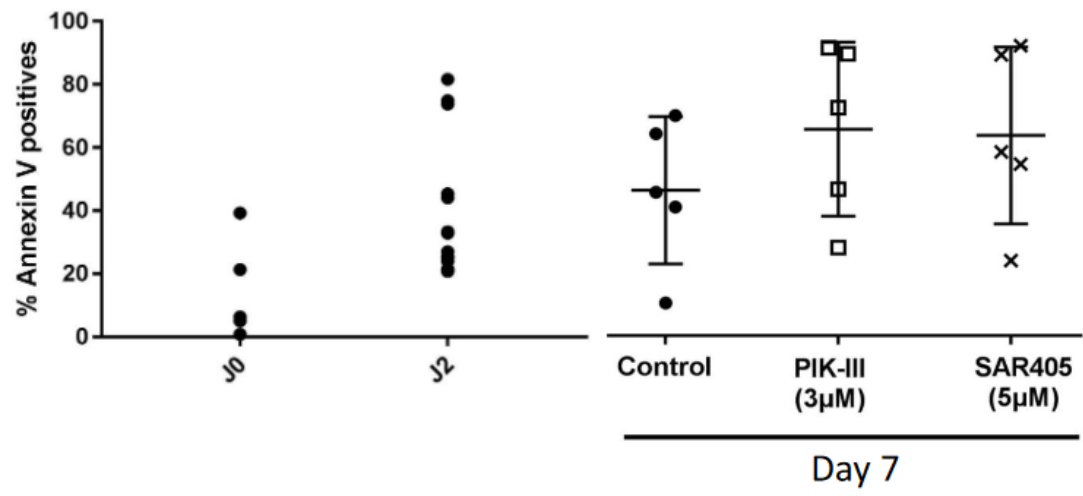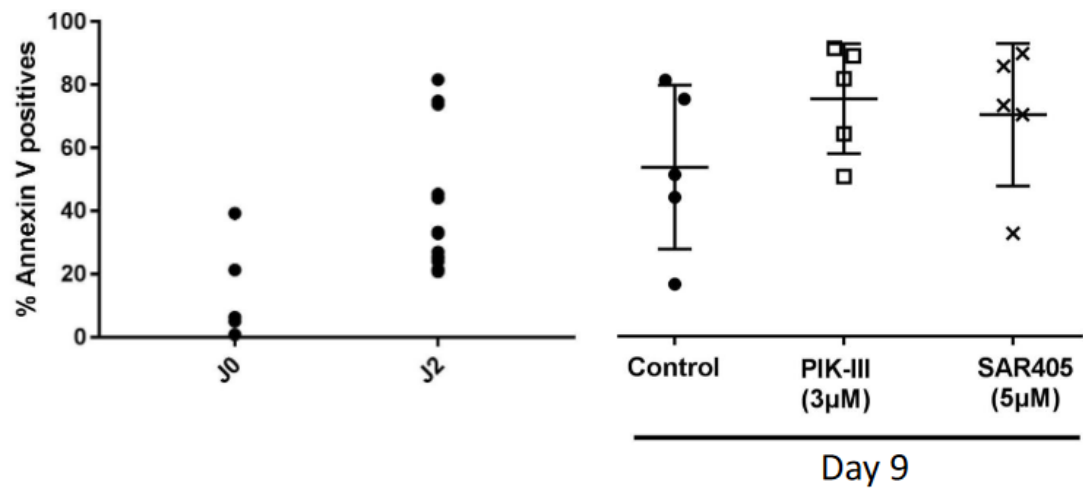

Figure S5

Full time experiment day 53

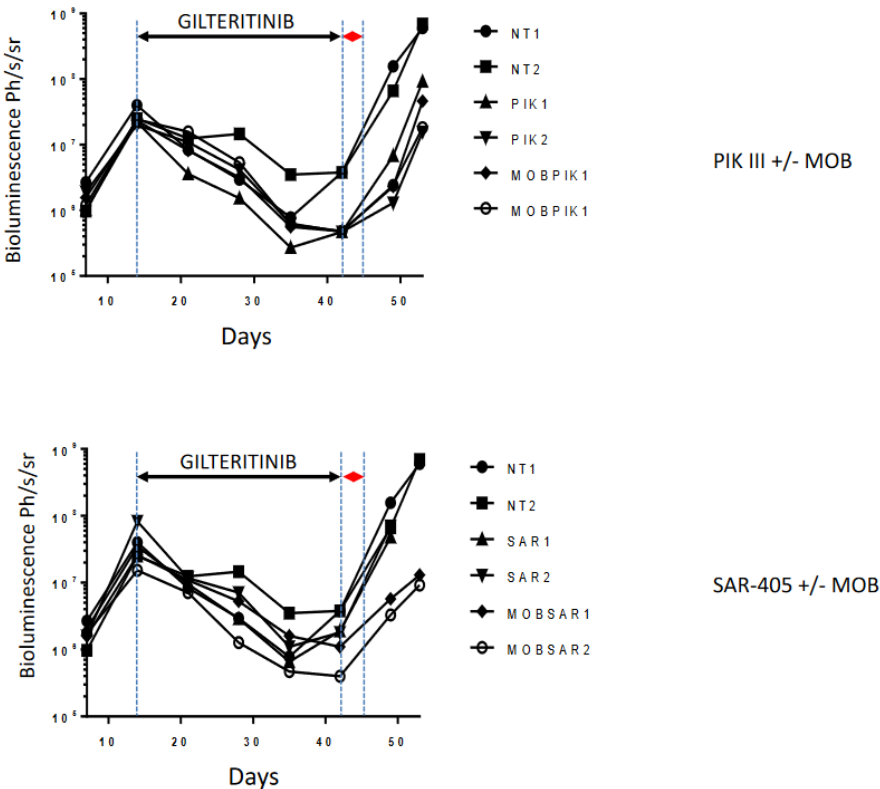

Western-blots

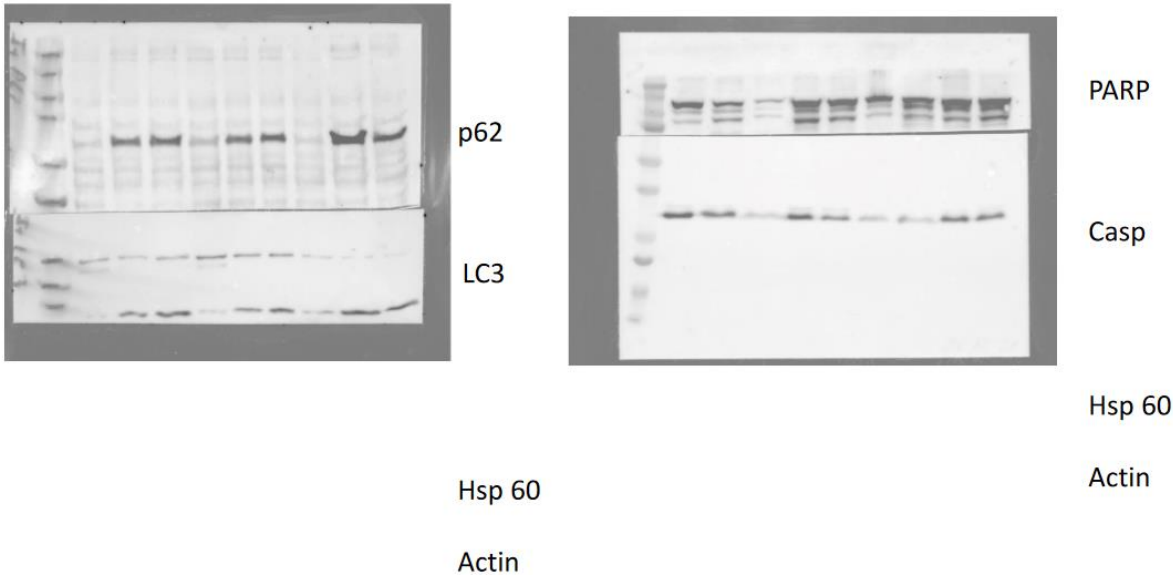

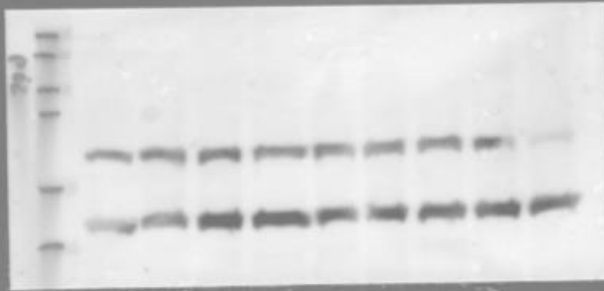

Hsp 60

Actin

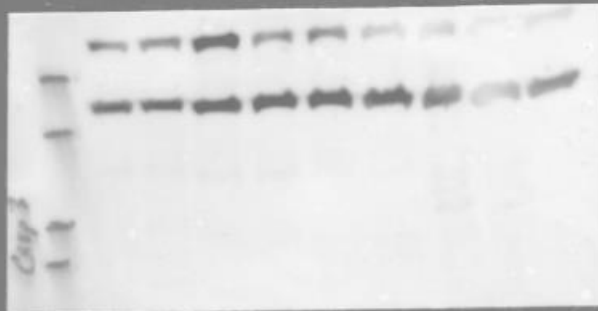

Hsp 60

Actin
